# Supplementary material for: Green and blue emitting 3D structured Tb:Ce2(WO4)3and Tb:Ce10W22O81micromaterials
Source: Royal Society of Chemistry journal article supplement (doi:10.1039/c5dt00764j), 2015-01-01
Supplement: c5dt00764j1.pdf [file c5dt00764j1.pdf]

## SUPPORTING INFORMATION

### **Green and blue emitting 3D structured Tb: Ce<sub>2</sub>(WO<sub>4</sub>)<sub>3</sub> and Tb: Ce<sub>10</sub>W<sub>22</sub>O<sub>81</sub> micromaterials**

**Anna M. Kaczmarek,<sup>\*a</sup> Dorine Ndagsi,<sup>a</sup> Isabel Van Driessche,<sup>c</sup> Kristof Van Hecke,<sup>b</sup> Rik Van Deun<sup>\*a</sup>**

*<sup>a</sup> L<sup>3</sup>- Luminescent Lanthanide Lab, Department of Inorganic and Physical Chemistry, Ghent University, Krijgslaan 281-S3, B-9000 Ghent, Belgium*

*E-mail: [rik.vandeun@ugent.be](mailto:rik.vandeun@ugent.be)*

*E-mail: [anna.kaczmarek@ugent.be](mailto:anna.kaczmarek@ugent.be)*

*<sup>b</sup> XStruct, Department of Inorganic and Physical Chemistry Ghent University, Krijgslaan 281-S3, B-9000 Ghent, Belgium*

*<sup>c</sup>SCRiPTS, Department of Inorganic and Physical Chemistry Ghent University, Krijgslaan 281-S3, B-9000 Ghent, Belgium*

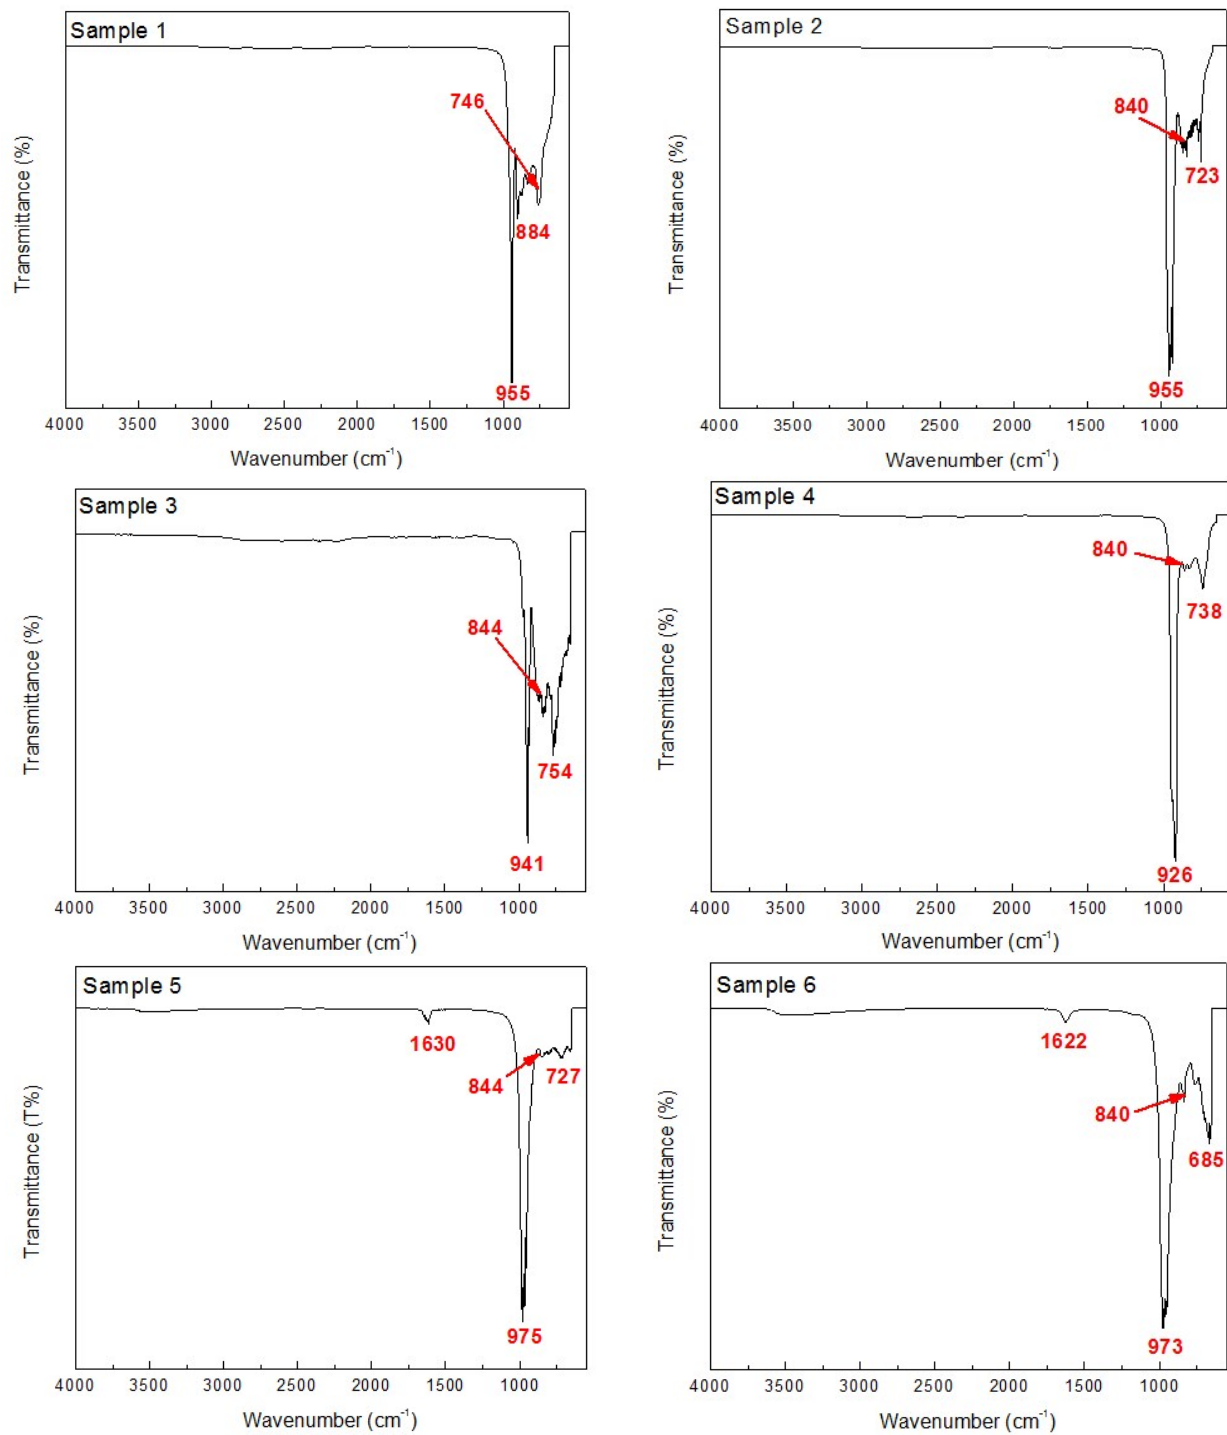

**Fig. S1.** DRIFTS spectra of samples 1 - 6.

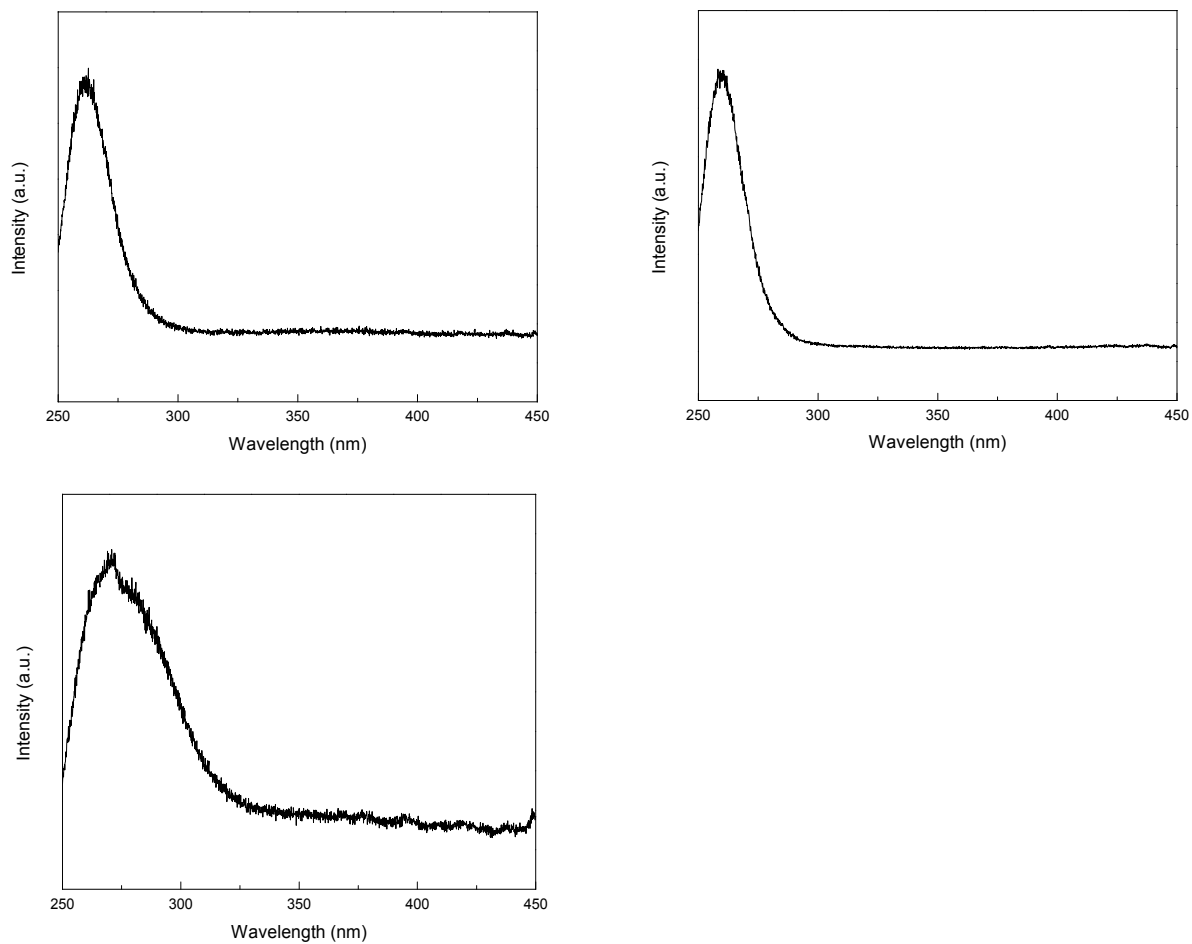

**Fig. S2.** Excitation spectra of samples: **5% Tb doped 2** (top left), **5% Tb doped 3** (top right), and **5% Tb doped 4** (bottom left).

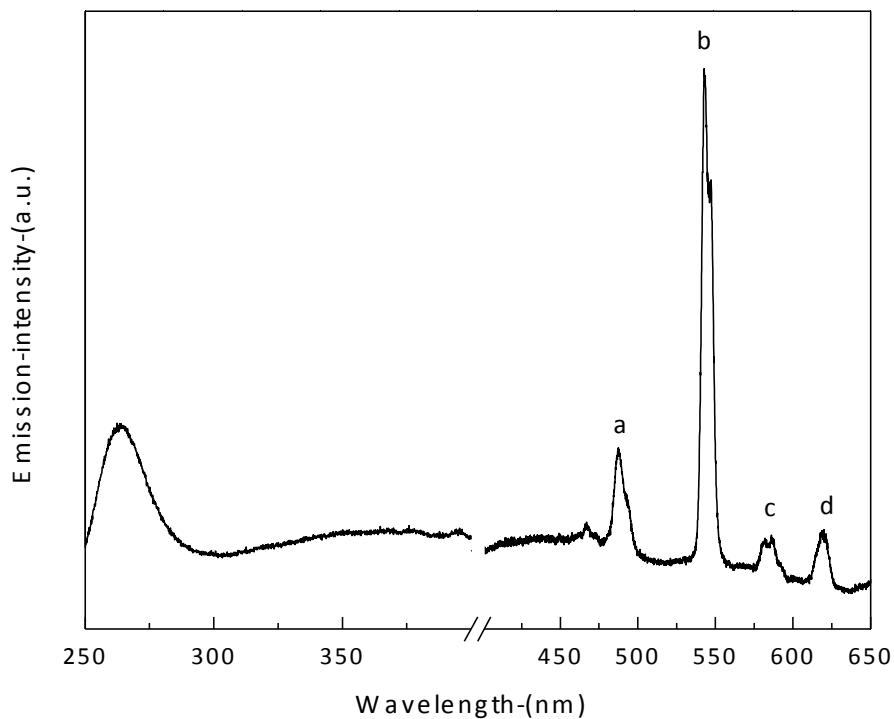

**Fig S3.** Combined excitation and emission spectrum of **5%Tb doped 5** sample (excited at 266.0 nm and observed at 543.0 nm).

**Table S1.** CIE chromaticity coordinates for **5% Tb<sup>3+</sup> doped 1-6** materials (when excited into the W-O charge transfer band).

| Sample               | CIE (x) | CIE (y) | Color      |
|----------------------|---------|---------|------------|
| <b>5% Tb doped 1</b> | 0.31    | 0.51    | green      |
| <b>5% Tb doped 2</b> | 0.32    | 0.51    | green      |
| <b>5% Tb doped 3</b> | 0.30    | 0.52    | green      |
| <b>5% Tb doped 4</b> | 0.31    | 0.50    | green      |
| <b>5% Tb doped 5</b> | 0.25    | 0.37    | blue-green |
| <b>5% Tb doped 6</b> | 0.23    | 0.32    | blue       |
